1 **Benchmarking algorithms for joint integration of unpaired and paired single-cell**  
2 **RNA-seq and ATAC-seq data**

3

4 Michelle Y. Y. Lee<sup>1,3</sup>, Klaus H. Kaestner<sup>1</sup>, Mingyao Li<sup>2</sup>

5

6 1. Department of Genetics, University of Pennsylvania, Philadelphia, PA 19104, USA

7 2. Department of Biostatistics, Epidemiology and Informatics, Perelman School of Medicine,  
8 University of Pennsylvania, Philadelphia, PA, USA

9 3. Graduate Group in Genomics and Computational Biology, University of Pennsylvania  
10 Perelman School of Medicine, Philadelphia, Philadelphia, PA, 19104, US

11 Address correspondence to: [kaestner@pennmedicine.upenn.edu](mailto:kaestner@pennmedicine.upenn.edu) or

12 [mingyao@pennmedicine.upenn.edu](mailto:mingyao@pennmedicine.upenn.edu)

## 13 **Abstract**

14 Single-cell RNA-sequencing (scRNA-seq) measures gene expression in single cells, while  
15 single-nucleus ATAC-sequencing (snATAC-seq) enables the quantification of chromatin  
16 accessibility in single nuclei. These two data types provide complementary information for  
17 deciphering cell types/states. However, when analyzed individually, scRNA-seq and snATAC-  
18 seq data often produce conflicting results regarding cell type/state assignment. In addition, there  
19 is a loss of power as the two modalities reflect the same underlying cell types/states. Recently, it  
20 has become possible to measure both gene expression and chromatin accessibility from the  
21 same nucleus. Such paired data make it possible to directly model the relationships between  
22 the two modalities. However, given the availability of the vast amount of single-modality data, it  
23 is desirable to integrate the paired and unpaired single-modality data to gain a comprehensive  
24 view of the cellular complexity. Here, we benchmarked the performance of seven existing  
25 single-cell multi-omic data integration methods. Specifically, we evaluated whether these  
26 methods are able to uncover peak-gene associations from single-modality data, and to what  
27 extent the multiome data can provide additional guidance for the analysis of the existing single-  
28 modality data. Our results indicate that multiome data are helpful for annotating single-modality  
29 data, but the number of cells in the multiome data is critical to ensure a good cell type  
30 annotation. Additionally, when generating a multiome dataset, the number of cells is more  
31 important than sequencing depth for cell type annotation. Lastly, Seurat v4 is the best at  
32 integrating scRNA-seq, snATAC-seq, and multiome data even in the presence of complex batch  
33 effects.

34

## 35 **Background**

36

37 Over the past ten years, hundreds of single-cell RNA-seq (scRNA-seq) (for transcript  
38 abundance in single cells) or single-nucleus ATAC-seq (snATAC-seq) (for chromatin  
39 accessibility in single nuclei) have been produced by laboratories worldwide, leading to the  
40 discovery of new cell types and regulatory circuits. In addition, by applying single-cell assays to  
41 two-state models such as the comparison between control and mutant tissues, changes in gene  
42 expression or chromatin accessibility caused by a gene mutation could be analyzed at the cell  
43 type-specific level easily for the first time. Unfortunately, each single-modality dataset measures  
44 either the gene expression or the chromatin accessibility of a given cell. Although the two  
45 datasets are generated from the same cell population, they measure different cells. Most of the  
46 time, the two experimental modalities result in the identification of similar cell types, as the  
47 promoters of highly expressed genes used to define cell types at the transcript levels are  
48 frequently also identified as highly accessible by the ATAC-seq modality. However, there are  
49 situations in which the two profiles are discordant. In these situations, simultaneous, joint  
50 profiling of gene expression and chromatin accessibility is paramount for resolving inconsistency  
51 and revealing novel cell types and states that show modality-specific features. Moreover, the  
52 joint profiling of gene expression and chromatin accessibility of the same exact cells offers the  
53 most direct link between *cis*-regulatory elements and their target genes [1].

54

55 Recently, the simultaneous determination of both transcript levels and chromatin state in  
56 the same nucleus has become possible, using so-called “multi-omics” approaches. An example  
57 is the 10x Genomics single cell Multiome ATAC + gene expression technology [2]. Multi-omics  
58 datasets are clearly superior at refining cell types and revealing gene regulatory networks [1].  
59 However, it is not practical to repeat all prior studies of interest performed using the single-  
60 modality assays with the multiome approaches, as frequently precious samples are either no  
61 longer available or funding is limited. Therefore, it is highly desirable to integrate pre-existing  
62 single-modality scRNA-seq and snATAC-seq datasets with multiome data generated  
63 subsequently using the newer technology to achieve more accurate cell type annotations.

64

65 Several methodologies have been developed for multi-omic data integration. Here, we  
66 refer to multi-omic integration as the integration of RNA-seq and ATAC-seq profiles measured in  
67 single cells, either with or without the guidance of multiome data. These methods attempt to  
68 align cells profiled by separate technologies and project them into one common low-dimensional

69 space to ensure consistent cell type calling. However, we still lack an objective evaluation of  
70 whether the addition of the multiome data improves the annotation of single-modality datasets.  
71 Furthermore, some of the methods try to impute the missing modality for the single-modality  
72 datasets and identify peak-gene pairs using these ‘pseudo-paired’ datasets. Thus, it is still  
73 uncertain if the imputed missing modality can truly provide additional biological insights to the  
74 same degree as provided by the experimentally produced multiome datasets. Finally, given the  
75 availability of many methods for multi-omic data integration, at present, we do not know which  
76 method performs the best when integrating all three data types.

77

78         The current multi-omic integration methods can be divided into two categories. Methods  
79 in the first category perform multi-omic integration using only the single-modality datasets,  
80 aiming to find a mapping between gene expression profiles and chromatin accessibility states to  
81 create an aligned space that explains both modalities; we call these approaches ‘unpaired  
82 integration’. Representative methods in this category include Seurat version 3 (Seurat v3) [3],  
83 which performs canonical correlation analysis (CCA) to align experimentally measured gene  
84 expression with pseudo-gene expression obtained from chromatin accessibility. One example of  
85 pseudo-gene expression is the gene activity score, calculated by summing up peak counts  
86 within the gene body plus 2kb upstream in the ATAC-seq data. LIGER [4] also uses the gene  
87 expression and gene activity score to obtain shared features between the two modalities and  
88 then derives a low-dimensional embedding through a non-negative matrix factorization  
89 approach. FigR [5] aligns the snATAC-seq and scRNA-seq data using a CCA-based approach.  
90 In addition, it provides matching of snATAC-seq and scRNA-seq cells, which enables the  
91 identification of *cis*-regulatory elements similar to paired multiome data. BindSC [6] goes beyond  
92 the simple construction of gene activity scores. Instead, bindSC uses a bi-directional CCA to  
93 empirically construct a cell-by-gene matrix for the snATAC-seq cells that preserve its similarity  
94 with the ATAC-seq input and simultaneously maximizes the correlation with the scRNA-seq  
95 matrix it is being integrated with.

96

97         Methods in the second category encompass more recent approaches that incorporate  
98 information from multiome cells and integrate all three data types for a more comprehensive  
99 exploration of cellular identities; we term these approaches ‘multiome-guided integration’.  
100 Representative methods in this category include Seurat version 4 (Seurat v4) [7], an approach  
101 that first learns a low-dimensional representation of the cells profiled by the multiome  
102 methodology using both the RNA-seq and ATAC-seq profiles by weighted nearest neighbors

103 (WNN) analysis [7]. Subsequently, the two single-modality datasets are projected onto the WNN  
104 embedding space in a supervised manner. MultiVI [8] and Cobolt [9] use a deep-learning  
105 approach called ‘variational autoencoder’ to embed all three data types. Both methods employ  
106 the encoder-decoder system to learn a low-dimensional representation of the data. Specifically,  
107 two encoders and two decoders are set up, one for each modality. However, there are different  
108 model choices. MultiVI assumes a negative binomial distribution for the RNA-seq data and a  
109 Bernoulli distribution for the ATAC-seq data, while Cobolt assumes a Multivariate Normal  
110 distribution for both modalities. Furthermore, the two methods integrate the modality-specific  
111 representation for the paired cells differently. MultiVI first aligns the two embeddings through a  
112 symmetric Kullback-Leibler (KL) divergence loss and then obtains an average of the two  
113 embeddings. On the other hand, Cobolt simply multiplies the two embeddings to represent the  
114 paired cells, while the representation of the unpaired cells is first generated by the  
115 corresponding encoder and refined using a linear transformation to ensure enough similarity  
116 between the RNA-seq derived embedding and the ATAC-seq derived embedding.

117

118 All methods described above aim to project cells from different data types into one  
119 shared space to facilitate the identification of cell types through clustering. Nevertheless, a  
120 common goal for studies profiling chromatin accessibility and gene expression at the single-cell  
121 level is to understand cell type-specific *cis*-regulatory logic. Since the two single-modality  
122 datasets are generated from different cells in a given population, albeit representing the same  
123 cell types, the single-modality datasets cannot be naïvely combined to test for association  
124 between chromatin accessibility and gene expressions. Therefore, multiple efforts have  
125 attempted to impute the missing modality for the single-modality datasets, aiming to  
126 computationally generate paired profiles similar to those measured experimentally by the  
127 multiome technology. Some methods mentioned above, e.g., Seurat v3, FigR, bindSC, Seurat  
128 v4, and MultiVI, are capable of this task. However, an objective evaluation of how reliable the *in-*  
129 *silico* imputed profiles are compared to what is directly measured by the paired multiome  
130 technologies is still lacking. Therefore, we aimed to conduct an extensive benchmarking  
131 analysis to evaluate the above-mentioned methods by addressing two important questions. First,  
132 do multiome data help the integration of single-modality datasets? Second, what is the best  
133 computational method for the integration of scRNA-seq, snATAC-seq, and multiome data?

134

## 135 **Results**

## 136 **Overview of the benchmarking scheme and evaluation strategies**

137 The overall workflow of our benchmarking evaluations is summarized in Figure 1. Figure 1A  
138 illustrates our approach to evaluate whether multiome data integration can improve the value of  
139 single-modality datasets, while Figure 1B outlines how we assess the effectiveness of each  
140 integration methods, at various conditions of the multiome dataset. To answer the proposed  
141 questions, we simulated situations where all three data types are available by using two publicly  
142 available multiome datasets [10, 11]. The first multiome dataset [10] profiled 10,085 peripheral  
143 blood mononuclear cells (PMBCs) and represents a simple biological system, because PBMCs  
144 can be easily divided into seven well-separated cell types (Supplementary Figure 1A). The  
145 second dataset profiled bone marrow mononuclear cells (BMBC) [11], an example of highly  
146 complex cell populations. BMBCs are closely related to each other transcriptionally, and contain,  
147 for example, myeloid progenitors and their closely related descendants, CD16+ and CD14+  
148 monocytes (Supplementary Figure 1B). The individual BMBC cell types are therefore much  
149 harder to separate compared to the PBMC populations, thus allowing us to thoroughly evaluate  
150 the performance of each method in both simple and complex biological systems. Moreover, the  
151 BMBC dataset is composed of samples generated from four research sites and nine donors  
152 [12], which enables the analysis of batch effects and technical replicates.

153  
154 We evaluated four popular unpaired integration methods (Seurat v4, LIGER, FigR,  
155 bindSC), and three multiome-guided integration methods (Seurat v4, MultiVI, and Cobolt). To  
156 account for the increased power resulting from the larger absolute number of cells employed  
157 during the integration process by the multiome-guided methods, we created another scenario  
158 termed 'unpaired (multiome-split)' in which the RNA-seq and ATAC-seq data from the multiome  
159 samples were treated as independent datasets and appended to the single-modality datasets.  
160 This category again includes the four unpaired-integration methods, the only difference being  
161 that the single-modality datasets now include additional single-modality cells that were  
162 converted from the multiome cells.

163  
164 To evaluate the performance of each method for cell type identification, we performed  
165 Louvain clustering [13] on the integrated embedding. For methods capable of missing modality  
166 imputation, we imputed gene expression using snATAC-seq profiles. We then evaluated the  
167 integration results in four aspects as shown in Figure 1A. Specifically, we evaluated cell type  
168 annotation accuracy using two metrics: Adjusted Rand Index (ARI) [14] and Normalized Mutual  
169 Information (NMI) [15]. Both metrics range from 0 to 1, with 1 being the best. The detailed

170 approach is described in the Methods section. The accuracy of cell type annotation depends on  
171 the number of cell clusters identified; therefore, an additional way to measure data integration  
172 quality is via the accuracy of cell type separation. Using the ground-truth annotation, we  
173 evaluated how well cells of different identities are separated, using a cell type specific average  
174 silhouette width (ASW) [16] and a cell type Local Inverse Simpson's Index (cLISI) [17, 18].  
175 Furthermore, because the three data types could have technology-specific differences, we used  
176 a batch ASW [16] and the k-nearest neighbor batch effect test (kBET) [16] to measure batch-  
177 mixing of the integrated results. These four measurements were normalized to be in the range  
178 of 0 and 1 in which 1 is the best result, namely high separation between cell types and complete  
179 mixing of data batches.

180

181 We also evaluated the quality of 'peak to gene pair' predictions by assessing the  
182 accuracy of assigning an ATAC-seq peak to a specific gene. Using the measured ATAC-seq  
183 and imputed RNA-seq data, we computed the percentage of significant peak-gene pairs  
184 recovered as compared to a ground truth obtained using all cells in the multiome dataset. To  
185 penalize for the presence of false positives reported by the data integration methods, we also  
186 calculated an F1 score [15], which normalized the absolute percent recovery of the true peak-  
187 gene pairs by the occurrence of false positive and false negative relationships.

188

## 189 **Do Multiome data improve the annotation of single-modality datasets?**

190

### 191 **PBMC**

192 To answer if multiome data improve the analysis of single-modality datasets (scRNA-seq and  
193 scATAC-seq), we first simulated the situation with 1,000 scRNA-seq cells and 1,000 snATAC-  
194 seq cells based on the PBMC data. These single-modality cells were integrated using each of  
195 the four unpaired integration methods. To evaluate if multiome data improve the analysis of  
196 single-modality datasets, we considered the situation where we have a multiome dataset,  
197 potentially with different numbers of cells (e.g., 1000, 3000, or 8000). These multiome data were  
198 integrated with the single-modality datasets using the multiome-guided methods. However,  
199 because the number of cells used during clustering and gene expression imputation impacts the  
200 clustering accuracy and peak-gene association identification, we ran the unpaired integration  
201 methods again, this time treating the multiome dataset as single-modality cells and adding them  
202 to the existing single-modality data. Here, any increase in performance is solely caused by the  
203 increase in cell number; the results from these evaluations are labeled as the 'unpaired

204 (multiome-split)' category. For each simulation, we randomly drew the cells from the 10,085  
205 PBMC dataset and each condition was repeated five times. The parameters used for this  
206 simulation are summarized in Figure 2A.

207

208 The evaluation result for each method is summarized in Figure 2B. Without the  
209 incorporation of multiome data, the cell type annotation accuracy was already good, being 0.81  
210 in ARI and 0.81 in NMI when integrating the unpaired data using the bindSC program (Figure  
211 2B). Surprisingly, in the presence of 1,000 multiome cells, the multiome-guided approaches  
212 performed worse than simply integrating the data from the 2,000 single-modality cells by  
213 themselves (Figure 2B). This unexpected result is likely caused by the fact that 1,000 multiome  
214 cells alone do not achieve good cell type separation, which is a critical requirement for the  
215 multiome-guided methods to succeed. However, when we used 3,000 or 8,000 multiome cells,  
216 Seurat v4, one of the multiome-guided methods, achieved the best results in terms of cell type  
217 annotation (Figure 2B). Furthermore, when comparing the multiome-guided results with  
218 unpaired (multiome-split) results, the performance of Seurat v4 remained higher when there are  
219 3,000 or 8,000 cells (Figure 2B). Thus, our findings indicate that the multiome data can improve  
220 cell type annotation of the single modality datasets, provided that there is a sufficient number of  
221 multiome cells available.

222

223 Next, we evaluated the performance of each method in predicting peak-gene pairs.  
224 Peak-gene pairs are calculated using 1,000 measured chromatin accessibility profiles and the  
225 corresponding 1,000 imputed gene expression profiles. Here, we compared predicted peak-  
226 gene pairs to the ground-truth list calculated using multiome cells in the full PBMC data. Seurat  
227 v3 performed very well at recovering the absolute number of peak-gene pairs, and the  
228 incorporation of data from multiome cells through splitting only marginally increased the  
229 performance (Figure 2B). BindSC had a slightly better F1 score than Seurat v3, meaning that  
230 the Seurat v3 results contained more false positives (Figure 2B). For the multiome-guided  
231 methods, the more multiome cells available during gene expression imputation resulted in  
232 higher peak-gene pair recovery (Figure 2B). Nevertheless, the incorporation of data from  
233 multiome cells using the multiome-guided methods did not perform better than the unpaired  
234 methods, with the exception that the F1 score was higher in MultiVI (Figure 2B).

235

236 The number of cells used for predicting peak-gene pairs influences the accuracy. To  
237 give a general idea of how well the predicted gene expression profiles are, we compared the



238 peak-gene pair identification result to the one obtained using the real paired profiles. We  
239 included a red dashed line in Figure 2B to indicate the percentage of peak-gene pair recovery  
240 and F1 score calculated using the measured, paired gene expression and chromatin  
241 accessibility profiles of the 1,000 cells being evaluated, instead of the gene expression profile  
242 imputed from chromatin accessibility. What's surprising is that the in-silico prediction profile from  
243 Seurat v3 revealed a higher percentage of recovered peak-gene pairs and a better F1 score  
244 than the measured paired gene expression and chromatin accessibility profile from 1,000 cells.  
245 This is likely due to the dropout issue common to single-cell assays and the predicted RNA  
246 profile can borrow information from similar cells, thus recovering the trend better. However, we  
247 also note that the predicted profiles only recovered less than 45% of the ground-truth list  
248 calculated using the full PBMC data with 10,412 cells. Although the predicted profiles are better  
249 than the measured gene expression profiles, it is only recovering a small percentage of peak-  
250 gene pairs revealed by the experimentally generated multiome dataset.

251

## 252 **BMMC**

253 Having evaluated the various data integration platforms with the PBMC data, which represent a  
254 low-complexity situation with clearly defined major cell types, we next sought to determine how  
255 the different methodologies perform when analyzing data from highly complex cell populations,  
256 as is the case for bone marrow mononuclear cells (BMMC). Here, to avoid complexity caused  
257 by batch differences, we only used 6,740 multiome cells from one sample (site 1 donor 2). We  
258 again started with 1,000 scRNA-seq and 1,000 snATAC-seq cells, and then tested the result  
259 when incorporating 1000, 2000, and 4000 multiome cells, composed of 21 cell types (Figure 2A).  
260 In this biological system, we found that including a larger number of multiome cells improved  
261 cell type annotation, with Seurat v3 performing the best among the unpaired (multiome-split)  
262 methods (Figure 2C). Among the multiome-guided methods, Seurat v4 achieved the best  
263 performance when the input data included 4,000 multiome cells. Remarkably, when we  
264 employed data from only 1,000 or 2,000 multiome cells, all multiome-guided methods performed  
265 worse than when inputting the multiome data as two separate, unpaired modalities (Figure 2C).  
266 A similar trend was observed in the peak-gene pair prediction (Figure 2C). The likely reason  
267 causing the poor performance of the multiome-guided methods is the limited quality of multiome  
268 data and the high complexity of the biological system being profiled. Note that peak-gene  
269 prediction recovery and F1 score obtained via the unpaired Seurat v3 algorithm are still higher  
270 than the association calculated from the observed multiome profile indicated by the red dash  
271 line in Figure 2C.

272

### 273 **Comparison of run time and visualization of integration**

274 Another important issue to consider when comparing various computational approaches is the  
275 computation time needed to complete a given task. All methods were run with 8 CPU cores and  
276 64GB of RAM. Figure 2D shows the runtime, measured in seconds. Unpaired methods all have  
277 similar runtimes, and the increase in the unpaired (multiome-split) category was due to the  
278 incorporation of the additional data from multiome experiments. Importantly, the multiome-  
279 guided methods vary greatly in runtime and thus costs. Cobolt was the fastest method, but  
280 unfortunately, it exhibited comparatively low clustering accuracy and peak-gene recovery.  
281 Seurat v4 had a shorter runtime than the unpaired (multiome-split) methods, while MultiVI took  
282 the longest to complete the assigned tasks, due to its use of variational autoencoder.

283

284 To visually examine the integration results, we generated UMAP plots using the  
285 integrated latent embedding and colored the cells by the ground-truth annotation, the predicted  
286 identity, and the dataset origin (Figure 2E). We showed the best-performing results from both  
287 the unpaired (multiome-split) and multiome-guided categories for each of the PBMC and BMMC  
288 simulations. Additional evaluation on cell type separation and batch-mixing are shown in  
289 Supplementary Figure 2. Most metrics show method-specific values, meaning the rankings of  
290 methods do not change across different numbers of multiome cells. Among the unpaired  
291 methods, Seurat v3 is the best at separating cell types in the integrated space, but it has the  
292 worst batch mixing result. On the other hand, FigR shows the opposite trend; it ranked the  
293 highest for batch mixing, but the lowest for cell type separation. Among the multiome-guided  
294 integration methods, MultiVI mixes the batches better while Seurat v4 often results in a higher  
295 cell type silhouette score, especially when there is a greater number of multiome cells. We also  
296 evaluated the integration results visually, through examining UMAP projection of the integration  
297 results as shown in Supplementary Figure 3 for the PBMC simulations and Supplementary  
298 Figure 4 for the BMMC simulations. Visually, we do not see drastic differences between  
299 methods and there are no methods showing particularly poor cell type separation or batch  
300 mixing result. Therefore, we conclude that the incorporation of multiome cells improves cell type  
301 annotation when there are enough cells to resolve the cell type heterogeneity in the multiome  
302 dataset alone.

303

304

305 **How to spend your sequencing dollars: more cells or increased sequencing depth?**

306

307 Experimentalists are commonly constrained by budget limitations and need to consider whether  
308 sequencing a larger number of cells at low depth or a smaller number of cells at high depth is  
309 the more productive approach. To answer this question, we evaluated how the sequencing  
310 depth of the multiome approach influences the integration result. Since we know that including  
311 multiome data improves cell type annotation for the single-modality datasets, for this analysis,  
312 we aimed to evaluate the cell type annotation accuracy of the three data types together. Table 1  
313 shows the sequencing depth of the original multiome samples. To simulate data with lower  
314 depths, we down-sampled the reads for both RNA and ATAC profiles to 25%, 50%, 75% of the  
315 original data (Figure 3A) and compared these results to the original samples. We performed this  
316 experiment on both the PBMC dataset (Figure 3B) and the BMMC dataset (Figure 3C). For the  
317 PBMC study, the increase in sequencing depths resulted in an increase in cell type annotation  
318 accuracy for all methods, with Seurat v4 achieving the highest ARI and NMI among all methods  
319 for 75% and 100% depth. In contrast, when we used the BMMC data set as the input, we noted  
320 that when including only 2,000 multiome cells, regardless of sequencing depth, the unpaired  
321 method (Seurat v3) performed the best. However, when we included 4,000 cells in the BMMC  
322 multiome sample, 50% of read depth was sufficient for Seurat v4 to annotate the cell types most  
323 accurately. These conflicting results prompted us to ask whether sequencing depth is less  
324 important than cell number.

325

326 To answer this question, we designed another simulation. Given a fixed cost for  
327 1,000,000 RNA-seq reads and 4,000,000 ATAC-seq reads, we used either 400 cells with 100%  
328 of the depth (see Table 1), or 10% of the reads for 4,000 cells. Next, we analyzed the datasets  
329 using Seurat v3 and Seurat v4, the best-performing method in each category based on Figure  
330 3C. For cell type annotation accuracy, the sequencing depth curve plateaued sooner than the  
331 number of cells curve. For Seurat v4, the ARI and NMI did not increase much beyond 60%  
332 sequencing depth, while both scores increased consistently as the number of cells increases.  
333 Comparing Seurat v3 with Seurat v4, we noted that Seurat v4 performed better when there was  
334 30% sequencing depth given 4,000 cells or 2,600 cells given 100% depth. Therefore, for the  
335 accuracy of cell type annotation for integrated data, having more cells is more important than  
336 having a higher sequencing depth. Importantly, once a sufficient number of cells has been  
337 profiled to capture the complexity of a given sample, the multiome-guided methods, specifically  
338 Seurat v4, are the best. Our analysis also demonstrated that the 'sufficient' number of cells  
339 depends on the complexity of the biological system in question. For PBMC, we see that if the

340 goal is to detect seven distinct cell types, 2,000 cells is already enough. However, for BMMC  
341 with its more complex cell type composition at least 2,600 cells are needed.

342

343 In addition to the cell type annotation accuracy, we also evaluated recovery of peak-  
344 gene association for the 1,000 single-modality ATAC-seq cells when incorporating multiome  
345 samples generated at ten different depths and numbers of cells. We see that Seurat v3 is  
346 consistently better than Seurat v4 (Figure 3D). Moreover, the number of cells and sequencing  
347 depth did not affect the percentage of peak-gene pair recovery nor the F1 score. This is likely  
348 because Seurat v3 predicts RNA expression using a nearest neighbor approach on the  
349 integrated space, and the software had enough cells in the scRNA-seq dataset for the prediction,  
350 thus changes in the multiome data did not affect the result.

351

352 Next, we evaluated cell type separation and batch mixing results as summarized in  
353 Supplementary Figure 5. Most metrics increased slightly as sequencing depth increased, but  
354 the ranking of methods is similar as described before. Overall, Seurat v4 shows the best  
355 separation of cell types in the integrated space, but the mixing of batches is the worst, across  
356 sequencing depths. A UMAP projection of each method under each simulated scenario is  
357 shown in Supplementary Figures 6-8 for visual comparison.

358

359 Overall, we conclude that the number of cells in the multiome data is more critical than  
360 sequencing depth for annotating cell types in the integrated data. On the other hand, treating  
361 multiome data as unpaired single-modality datasets recovers peak-gene pairs at a higher  
362 accuracy.

363

### 364 **Which method is the best at removing batch effects?**

365

366 It is common that scRNA-seq and snATAC-seq data are generated by different labs or from  
367 different individuals than the multiome data. Therefore, another key characteristic for integration  
368 methods is whether they can integrate samples displaying batch effects. To answer this  
369 question, we leveraged the complex batch structure present in the BMMC dataset. Figure 4A  
370 shows the technical batch or biological batch structure we aimed to evaluate, with the multiome  
371 cells coming from a different research site, or a different donor. Figure 4B shows the results of  
372 cell type annotation accuracy for unpaired integration methods and the multiome-guided  
373 methods. We again saw increasing cell type annotation accuracy as the number of multiome

374 cells increased. With 3,000 or more multiome cells, Seurat v4 again was the best-performing  
375 method. Seurat v4 is a supervised approach, meaning that the multiome sample serves as a  
376 reference to which the single-modality datasets are mapped to. Figure 4B shows that although  
377 the multiome sample has strong batch effects (Supplementary Figure 9), the supervised  
378 mapping approach resulted in the most accurate cell type annotation. Additional integration  
379 results are shown in Supplementary Figure 10 and the UMAP projections are shown in  
380 Supplementary Figures 11-12.

381

382 To further challenge all methods in the situation of complex mixtures of samples, we  
383 considered a situation where the multiome sample includes cells from a mixture of two donors,  
384 and the scRNA-seq and snATAC-seq data come from the same or different research sites. Due  
385 to batch effects in the multiome samples, we added one more category called ‘Seurat v4  
386 integrate’, in which the integration of samples was first done on each modality separately, then  
387 two modalities were joined using the Seurat v4 weighted nearest neighbor approach, and lastly  
388 combined with the single modality dataset (see more in Supplementary methods). Figure 4D  
389 shows that in the case of low batch effects between the two donors, Seurat v4 and ‘Seurat v4  
390 integrate’ performed similarly well at annotating cell types. However, in the presence of stronger  
391 batch effects, ‘Seurat v4 integrate’ outperformed all other methods for cell type annotation, with  
392 much higher cell type separation as measured in cell type average silhouette width (ASW)  
393 (Supplementary Figure 13). From the UMAP projection in Supplementary Figure 14, we see that  
394 ‘Seurat v4 integrate’ mixes cells from the two multiome samples much better than Seurat v4.  
395 Therefore, when the multiome data include two donors with strong batch effects, integration  
396 across the batches is required before mapping the single-modality datasets.

397

398

## 399 **Discussion**

400 In summary, we evaluated seven multi-omic integration methods under three realistic scenarios.  
401 Firstly, we showed that the incorporation of multiome data improves the cell type annotation  
402 accuracy of scRNA-seq and snATAC-seq data when there are sufficient number of cells in the  
403 multiome data to reveal cell type identities. Secondly, we showed that the number of cells in the  
404 multiome data plays a more important role than sequencing depth per cell for cell type  
405 annotation accuracy. Thus, when generating a multiome dataset with a fixed budget, a better  
406 strategy is to profile more cells so that rare cell types can be captured. Lastly, when the three

407 datasets to be integrated are confounded by batch effects, Seurat v4 resulted in the best cell  
408 type annotation accuracy.

409

410 In all evaluations, Seurat v4 demonstrated superior performance at resolving cell type  
411 heterogeneity when data from many multiome-profiled cells are available. This makes sense as  
412 Seurat v4 is a supervised approach in which single-modality cells are merely projected to the  
413 integrated space learned from the multiome dataset. Therefore, when the multiome data have  
414 an insufficient number of cells to reveal accurate cell types, the integration will lead to poor  
415 annotation accuracy. The other two multiome-guided methods, e.g., Cobolt and MultiVI, claim to  
416 be able to make use of all three data types. The hope is that the single-modality cells can help  
417 the clustering when multiome cells are small. However, as shown in Figures 2 and 3, both  
418 Cobolt and MultiVI performed worse than the unpaired integration methods that do not leverage  
419 the paired relationship of the multiome data. Therefore, when the multiome dataset has a small  
420 number of cells, it is better to treat the multiome cells as unpaired and append them to the  
421 single-modality datasets for the integration of three datasets.

422

423 There are several limitations of this study. Firstly, our simulations represent the most  
424 ideal situation, where the single-modality cells are generated from the exact same dataset as  
425 the multiome cells. In reality, the single-modality and the multiome data are generated from  
426 different experimental kits that could have slight differences since the multiome workflow is  
427 optimized to capture both gene expression and chromatin accessibility. Moreover, the gene  
428 expression captured through the multiome workflow is in fact measuring mRNA in individual  
429 nuclei, while scRNA-seq captures mRNA in whole cells. Slight differences between snRNA-seq  
430 and scRNA-seq datasets have been reported [19]. Lastly, the PBMC dataset did not have  
431 expert-annotated cell type labels. We followed a tutorial by Seurat v4 to obtain annotations [20],  
432 thus the evaluation of PBMC-simulated scenarios might favor Seurat v4. However, the BMMC  
433 data were manually annotated by experts and Seurat v4 still showed outstanding performance  
434 in evaluations based on this dataset.

435

436 Secondly, although Seurat v4 was the best at annotating cell types, it performed worse  
437 than unpaired integration methods at recovering peak-gene associations. Furthermore, even the  
438 best method only revealed 45% of peak-gene pairs detected in the paired multiome dataset,  
439 and many of the detected pairs are false positives. Moreover, we did not explore the possibility  
440 of imputing chromatin accessibility from scRNA-seq or appending imputed profile with observed

441 multiome sample. To truly integrate the three data types and understand the underlying *cis*-  
442 regulatory logic, one would hope to impute the missing modality for both the scRNA-seq and  
443 snATAC-seq data, and then append the imputed profiles with the multiome dataset to identify  
444 peak-gene pairs with the largest number of cells. Therefore, additional work needs to be done to  
445 evaluate the performance of different methods in jointly integrating the imputed single-modality  
446 datasets with the multiome samples for downstream analyses.

447

448

## 449 **Conclusions**

450 Our benchmarking evaluations showed that multiome data are helpful for annotating single-  
451 modality data. The number of cells in the multiome data is critical to ensure a good cell type  
452 annotation after integration and the exact number of cells depends on the complexity of the  
453 biological system. When generating a multiome dataset, the number of cells is more important  
454 than sequencing depth for cell type annotation. Lastly, Seurat v4 is the best at integrating  
455 scRNA-seq, snATAC-seq, and multiome data even in the presence of complex batch effects.

## 456 **Methods**

457

### 458 **Datasets**

459

#### 460 **Peripheral blood mononuclear cell (PBMC) dataset**

461 This dataset was generated using the 10x Genomics Single Cell Multiome ATAC + Gene  
462 Expression kit [10]. The PBMC dataset with granulocytes removed was downloaded from the  
463 10x Genomics website, which included 11,909 cells. The dataset was processed and annotated  
464 into 30 cell types following the Seurat tutorial [7, 20]. We grouped similar cell types and refined  
465 the annotations into 9 broad cell types (similar to the level 1 categories from the Azimuth  
466 database [3]): B-cells ('B'), CD4 T cells ('CD4 T'), CD8 Naïve T cells ('CD8 Naïve'), CD8  
467 Effector T cells ('CD8 TEM'), Dendritic cells ('DC'), Monocytes ('Mono'), Nature killer cell ('NK'),  
468 other T cell ('other\_T'), and other cell categories ('other'). The ATAC-seq profile released on 10x  
469 Genomics website was counting the Tn5 insertion events in each genomic region. Here, we  
470 retabulated the cell-peak matrix by the number of reads overlapping each genomic region, using  
471 the Signac's FeatureMatrix function [21]. We used the peak-based counting result as input for  
472 the peak-gene pair identification (described below) and subsequent simulations. The list of  
473 peak-gene pairs identified using all cells in the multiome dataset (10,412 cells) is treated as the  
474 ground truth when calculating percentage of peak-gene pair recovery or F1 score. 'Other\_T' and  
475 'other' cells were excluded from the data simulation due to their extensive separation in the  
476 UMAP embedding. After removal of cells, there are 10,085 cells used for simulation.

477

#### 478 **Bone marrow mononuclear cells (BMMC) dataset**

479 This dataset was generated as part of the "Open Problems in Single-cell Analysis" competition  
480 [12]. BMMC cells from nine healthy donors were profiled at four different research sites using  
481 the 10x Multiome ATAC + Gene Expression kit. The dataset was analyzed by Lance and  
482 colleagues [12], who annotated the cells into 22 cell types. The values in the cell-peak matrix of  
483 the ATAC-seq data was also the insertion-based counting, so we again converted it into peak-  
484 based counting as mentioned above. Data simulations related to Figures 2 and 3 were  
485 performed using cells from the site 1 donor 2 (S1D2) BMMC sample. This sample contains  
486 6,740 cells, annotated into 21 cell types. The peak-gene pair prediction accuracies shown in  
487 Figures 2 and 3 were calculated by comparing the result to a ground-truth list generated with the  
488 S1D2 sample. To simulate technical batch and biological batch effects (Figure 4), we used cells



489 generated at research site 1 or from donor 1, which includes a total of 29,486 cells, composed  
490 of 21 cell types (Supplementary Figure 1B).

491

## 492 **Evaluation metrics**

### 493 Annotation accuracy

494 Each integration method returns an integrated latent embedding matrix for cells. Louvain  
495 clustering was performed to identify  $k$  clusters, in which  $k$  is the number of cell types in the  
496 ground-truth annotation. To evaluate annotation accuracy, Adjusted Rand Index (ARI) [14] and  
497 Normalized Mutual Information (NMI) [15] from the Scib package (v1.0.2) [18] were calculated to  
498 compare the predicted cluster labels with the ground truth. Specifically, ARI compares every  
499 pair of cells in the dataset and calculates a similarity measurement by considering the number  
500 of cell pairs that are in the same cluster in both annotation results, versus the number of cell  
501 pairs showing discordant annotations. This metric is then adjusted by chance, as there will be a  
502 non-zero similarity between the two clustering results just due to random permutation of labels.  
503 The resulting metric ranges from 0 to 1 in which 1 means perfect matching between the two  
504 results while 0 means random labeling of cells. NMI is another measurement commonly used  
505 for comparison of two clustering results. NMI measures if knowing one label provides  
506 information about the other label. If the two lists are highly correlated, then it has high mutual  
507 information. NMI is then normalized by a factor to control for differences due to the number of  
508 clusters in each set of labels.

509

### 510 Cell type separation

511 We evaluated the separation of clusters and the tightness of cells in the integrated latent space  
512 derived from each method. We calculated cell type-specific average silhouette width (ASW) [18],  
513 using the ground-truth annotation and the joint embeddings. The resulting score is between 0  
514 and 1 in which 1 means small intra-cluster distance and high inter-cluster distance. We also  
515 calculated a cell type Local Inverse Simpson's Index (cLISI) [18], which is an adaptation of LISI  
516 previously used to quantify the degree of batch effects [17]. Here, cLISI was calculated using  
517 the ground-truth labels again in which it evaluates how many cells need to be drawn from a  
518 cell's neighborhood to draw a second cell of the same type. The score is normalized again so  
519 that 1 means good local neighborhood preservation of the same cell type while 0 is otherwise.

520

### 521 Batch mixing

522 To evaluate batch mixing, two metrics were employed. A batch ASW score was used to  
523 evaluate the within-batch distance and the across-batch distance [18]. The score was rescaled  
524 so that 0 is the worst and 1 is the best separation. To evaluate the local neighborhood accuracy,  
525 k-nearest neighbor batch effect test (kBET) was also performed [16]. Specifically, kBET  
526 measures the difference between observed batch frequency in the k-nearest neighbors  
527 compared to an expected frequency based on the number of cells in each batch. The value is  
528 rescaled to 0 and 1 in which 1 represents the optimal mixing of cells from different batches in  
529 which cells in the neighborhood are highly similar to the expected frequency.

530

### 531 Peak-gene pair recovery

532 To identify correlated peak-gene pairs, we used the methodology introduced in the SHARE-seq  
533 paper [1]. Specifically, a Pearson correlation is calculated between the raw accessibility count of  
534 every peak and the normalized UMI count of every gene if the peak is within 50,000 base pairs  
535 from the transcription start site (TSS) of the gene. The null distribution of correlation coefficients  
536 was then generated through selecting 100 peaks that have similar GC content, length, and  
537 accessibility as the target peak, and calculating correlation of the background peaks and the  
538 target gene. A one-sided t-test was used to calculate a p-value for every peak-gene pair by  
539 comparing to the background peaks and the peak-gene pairs with p-value less than 0.05 and z-  
540 score greater than 0.05 identified as significant peak-gene pairs. Associated peak-gene pairs  
541 were identified using all cells from each dataset. To evaluate the performance of each method  
542 at imputing gene expression from snATAC-seq data, a peak-gene association was calculated in  
543 the same manner using the raw cell-peak count of the unpaired ATAC data and the predicted  
544 gene expression generated by the evaluated methods. To evaluate the *in silico* imputed gene  
545 expression results, we calculated the percentage of peak-gene pairs recovered using the  
546 imputed gene expression and the observed snATAC-seq peak counts. To account for false  
547 negative results, we calculated an F1 score. Thus, the peak-gene pair percent recovery and the  
548 F1 score were used to evaluate each method that can impute missing gene expression.

549

### 550 **Evaluation scenarios**

551 We simulated three scenarios to evaluate the performance of each method. For each scenario,  
552 we simulated five independent replicates. Details regarding how each method was implemented  
553 are described in the Supplementary Methods.

554

555 **Scenario 1: evaluating the effect of multiome cells on single-modality integration.**

556

### 557 Data simulation

558 In this task, we first defined the number of cells to be drawn for each data type with an example  
559 shown in Figure 2A. Then, we randomly selected cells from the ground-truth multiome dataset  
560 according to the desired number of cells for each data type. For scRNA-seq, we kept the gene  
561 expression matrix; for snATAC-seq, we kept the cell-by-peak matrix and the fragment file; lastly,  
562 for the multiome sample, we kept all three data files. The cells were sampled without  
563 replacement.

564

### 565 Evaluated methods

566 We first ran the four unpaired integration methods (Seurat v3, LIGER, FigR, and bindSC) to  
567 integrate the simulated scRNA-seq and snATAC-seq datasets and the results were summarized  
568 under the 'Unpaired' categories. To make use of the multiome data, we ran the four methods  
569 again, with the multiome cells treated as unpaired. Specifically, the RNA profile from the  
570 multiome cells was appended to the scRNA-seq dataset, and the ATAC-seq profile was  
571 appended to the snATAC-seq dataset. The results from this category were summarized under  
572 'Unpaired (multiome-split)'. Lastly, we ran the multiome-guided methods with the scRNA-seq,  
573 snATAC-seq, and multiome datasets as input.

574

### 575 Evaluations

576 To evaluate if the presence of multiome cells improves the integration of single-modality  
577 datasets, we evaluated the annotation accuracy, peak-gene pair recovery, cell type separation,  
578 and batch mixing of the scRNA-seq and snATAC-seq cells.

579

## 580 **Scenario 2: evaluating the impact of sequencing depth in multiome cells on multi-omic** 581 **data integration.**

582

### 583 Data simulation

584 For this task, we first defined the number of cells in each data type as well as the percentage of  
585 original depth the multiome cells will be down-sampled to; an example is shown in Figure 3A.  
586 We first generated the three data types according to the number of cells defined. Then, we  
587 performed depth-down-sampling for both the gene expression and chromatin accessibility  
588 profiles of the multiome dataset. To down-sample the cell-by-gene count matrix for gene  
589 expression, we used `Scuttle::downsample` [22] to reduce the sample depth to a percentage of

590 the original dataset. To down-sample the ATAC-seq depth, we performed down-sampling on the  
591 fragment file and then regenerated the cell-by-peak count matrix. Specifically, we first counted  
592 the number of fragments corresponding to the selected cells, then we calculated the target  
593 depth by multiplying the original depth to the percentage factor. We randomly selected the  
594 number of reads as calculated, without replacement, and saved this file as the new fragment file.  
595 Then the down-sampled fragment file was sorted, recompressed, indexed with tabix and,  
596 tabulated into peak counts with the original feature set with Signac:: FeatureMatrix [21] function.  
597 This often resulted in less reduction in peak counts, as some of the fragments removed were  
598 not previously assigned to the peaks.

599

#### 600 Evaluated methods

601 We ran the unpaired integration methods with the multiome data appended to the single-  
602 modality datasets as described above, the results were summarized under 'Unpaired (multiome-  
603 split)'. We also ran the three multiome-guided methods.

604

#### 605 Evaluations

606 The evaluation of annotation accuracy, cell type separation and batch mixing were calculated  
607 using all cells present in simulated scRNA-seq, snATAC-seq, and the multiome datasets. Given  
608 how the multiome data were split and appended to the single-modality datasets for the 'unpaired  
609 (multiome-split)' category, it resulted in doubling the number of multiome cells. Thus, to ensure  
610 a fair comparison between the two categories of methods, half of the multiome cells appended  
611 to the RNA-seq were dropped while the other half of the multiome cells appended to the ATAC-  
612 seq were dropped. As a result, the same number of cells was evaluated for the 'unpaired  
613 (multiome-split)' and 'multiome-guided' methods.

614

615

### 616 **Scenario 3: evaluating the impact of batch effects on multi-omic data integration.**

617

#### 618 Data simulation

619 The analysis of batch effects was only possible for the BMMC dataset. As mentioned before, the  
620 BMMC dataset contains multiome cells generated at four different research sites and nine  
621 donors. To create different types of batches, we used the multiome cells from donor 1 but  
622 processed at three different sites (S1D1, S2D1, S4D1) as the data source to generate technical  
623 batches. We used the multiome cells generated at research site 1 but from different donors

624 (S1D1, S1D2, S1D3) as the source of biological batches. To generate scenarios with mixed  
625 technical and biological batch effects, we created more complex batch structures described as  
626 ‘complex test’ in Figure 4D using all samples that were either generated at research site 1 or  
627 donor 1. After defining which sample each data type comes from and the number of cells, the  
628 simulation is the same as described in ‘Scenario 1’, in which cells were randomly drawn from  
629 the ground-truth multiome dataset to simulate scRNA-seq, snATAC-seq, and multiome samples.

630

### 631 Evaluated methods

632 The same seven methods, four from the ‘unpaired (multiome-split)’ and three from ‘multiome-  
633 guided’ were ran. For situations where multiome were composed of two donors, an additional  
634 variation of Seurat v4 was added, termed ‘Seurat v4 integrate’. Specifically, the two multiome  
635 datasets were first integrated across donors to generate one integrated reference before it was  
636 used to integrate scRNA-seq and snATAC-seq datasets.

637

### 638 Evaluations

639 We calculated metrics measuring annotation accuracy, cell type separation, and batch mixing.  
640 For batch mixing, we calculated both the mixing of data types, as well as the mixing of samples.  
641 Similar to what was described in ‘Scenario 2’, to ensure that the same number of cells were  
642 evaluated for the unpaired (multiome-split) methods and the multiome-guided methods, half of  
643 multiome cells appended to the RNA-seq and the other half of the ATAC-seq dataset were  
644 dropped.

645

646 **Declarations**

647

648 **Availability of data and materials**

649 The source codes for simulation and evaluations are available online on GitHub at  
650 [https://github.com/myylee/benchmark\\_sc\\_multiomic\\_integration](https://github.com/myylee/benchmark_sc_multiomic_integration). For the multiome datasets  
651 used to generate simulated data, the 10x PBMC dataset was downloaded from  
652 <https://www.genomics.com/resources/datasets/pbmc-from-a-healthy-donor-granulocytes-removed-through-cell-sorting-10-k-1-standard-2-0-0> and the BMMC dataset was downloaded  
653 from GEO accession GSE194122, and the fragment files were obtained from the authors [23].

655

656 **Competing interests**

657 M.L. receives research funding from Biogen Inc. The other authors declare no competing  
658 interests.

659

660 **Funding**

661 This work was supported by the following grants: R01GM125301 (to M.L.), R01EY030192 (to  
662 M.L.), R01EY031209 (to M.L.), R01HL113147 (to M.L.), R01HL150359 (to M.L.), U01  
663 DK112217 (to K.H.K.), and U01 DK123594 (to K.H.K.).

664

665

666 **Authors' contributions**

667 M.Y.Y.L., M.L., K.H.K. conceived this project and designed the framework together. M.Y.Y.L.  
668 performed the simulations and evaluations with guidance from M.L. All authors wrote and edited  
669 the final manuscript. M.L. and K.H.K. supervised the study.

670

671 **Acknowledgements**

672 We thank everyone in the Li Lab and Kaestner lab for helpful discussions, especially Dr.  
673 Elisabetta Manduchi and Dr. Jonathan Schug.

674

675

676

677

678

## 679 References

- 680 1. Ma S, Zhang B, LaFave LM, Earl AS, Chiang Z, Hu Y, Ding J, Brack A, Kartha VK, Tay T, et al:  
681 **Chromatin Potential Identified by Shared Single-Cell Profiling of RNA and Chromatin.**  
682 *Cell* 2020, **183**:1103-1116 e1120.
- 683 2. **Chromium Single Cell Multiome ATAC + Gene Expression**  
684 [[https://www.10xgenomics.com/products/single-cell-multiome-atac-plus-gene-](https://www.10xgenomics.com/products/single-cell-multiome-atac-plus-gene-expression#faqs)  
685 [expression#faqs](https://www.10xgenomics.com/products/single-cell-multiome-atac-plus-gene-expression#faqs)]
- 686 3. Stuart T, Butler A, Hoffman P, Hafemeister C, Papalexi E, Mauck WM, 3rd, Hao Y,  
687 Stoeckius M, Smibert P, Satija R: **Comprehensive Integration of Single-Cell Data.** *Cell*  
688 2019, **177**:1888-1902 e1821.
- 689 4. Liu J, Gao C, Sodicoff J, Kozareva V, Macosko EZ, Welch JD: **Jointly defining cell types**  
690 **from multiple single-cell datasets using LIGER.** *Nat Protoc* 2020, **15**:3632-3662.
- 691 5. Kartha VK, Duarte FM, Hu Y, Ma S, Chew JG, Lareau CA, Earl A, Burkett ZD, Kohlway AS,  
692 Lebofsky R, Buenrostro JD: **Functional inference of gene regulation using single-cell**  
693 **multi-omics.** *Cell Genom* 2022, **2**.
- 694 6. Dou J, Liang S, Mohanty V, Miao Q, Huang Y, Liang Q, Cheng X, Kim S, Choi J, Li Y, et al:  
695 **Bi-order multimodal integration of single-cell data.** *Genome Biol* 2022, **23**:112.
- 696 7. Hao Y, Hao S, Andersen-Nissen E, Mauck WM, 3rd, Zheng S, Butler A, Lee MJ, Wilk AJ,  
697 Darby C, Zager M, et al: **Integrated analysis of multimodal single-cell data.** *Cell* 2021,  
698 **184**:3573-3587 e3529.
- 699 8. Tal Ashuach MIG, Michael I. Jordan, Nir Yosef: **MultiVI: deep generative model for the**  
700 **integration of multi-modal data.** *bioRxiv* 2021.
- 701 9. Gong B, Zhou Y, Purdom E: **Cobolt: integrative analysis of multimodal single-cell**  
702 **sequencing data.** *Genome Biol* 2021, **22**:351.
- 703 10. **PBMC from a Healthy Donor - Granulocytes Removed Through Cell Sorting (10k),**  
704 **single cell multiome atac + gene expression dataset by cell ranger arc 2.0.0.**  
705 [[https://www.10xgenomics.com/resources/datasets/pbmc-from-a-healthy-donor-](https://www.10xgenomics.com/resources/datasets/pbmc-from-a-healthy-donor-granulocytes-removed-through-cell-sorting-10-k-1-standard-2-0-0)  
706 [granulocytes-removed-through-cell-sorting-10-k-1-standard-2-0-0](https://www.10xgenomics.com/resources/datasets/pbmc-from-a-healthy-donor-granulocytes-removed-through-cell-sorting-10-k-1-standard-2-0-0)]
- 707 11. Lance CaL, Malte D. and Burkhardt, Daniel B. and Cannoodt, Robrecht and  
708 Rautenstrauch, Pia and Laddach, Anna and Ubingazhibov, Aidyn and Cao, Zhi-Jie and  
709 Deng, Kaiwen and Khan, Sumeer and Liu, Qiao and Russkikh, Nikolay and Ryazantsev,  
710 Gleb and Ohler, Uwe and , and Pisco, Angela Oliveira and Bloom, Jonathan and  
711 Krishnaswamy, Smita and Theis, Fabian J.: **Multimodal single cell data integration**  
712 **challenge: results and lessons learned.** *bioRxiv* 2022.
- 713 12. Lance C, Luecken MD, Burkhardt DB, Cannoodt R, Rautenstrauch P, Laddach A,  
714 Ubingazhibov A, Cao Z-J, Deng K, Khan S, et al: **Multimodal single cell data integration**  
715 **challenge: results and lessons learned.** *bioRxiv* 2022:2022.2004.2011.487796.
- 716 13. Wolf FA, Angerer P, Theis FJ: **SCANPY: large-scale single-cell gene expression data**  
717 **analysis.** *Genome Biol* 2018, **19**:15.
- 718 14. Hubert L, Arabie P: **Comparing Partitions.** *Journal of Classification* 1985, **2**:193-218.
- 719 15. Pedregosa F, Varoquaux G, Gramfort A, Michel V, Thirion B, Grisel O, Blondel M,  
720 Prettenhofer P, Weiss R, Dubourg V, et al: **Scikit-learn: Machine Learning in Python.**  
721 *Journal of Machine Learning Research* 2011, **12**:2825-2830.

- 722 16. Buttner M, Miao Z, Wolf FA, Teichmann SA, Theis FJ: **A test metric for assessing single-**  
723 **cell RNA-seq batch correction.** *Nat Methods* 2019, **16**:43-49.
- 724 17. Korsunsky I, Millard N, Fan J, Slowikowski K, Zhang F, Wei K, Baglaenko Y, Brenner M,  
725 Loh PR, Raychaudhuri S: **Fast, sensitive and accurate integration of single-cell data with**  
726 **Harmony.** *Nat Methods* 2019, **16**:1289-1296.
- 727 18. Luecken MD, Buttner M, Chaichoompu K, Danese A, Interlandi M, Mueller MF, Strobl DC,  
728 Zappia L, Dugas M, Colome-Tatche M, Theis FJ: **Benchmarking atlas-level data**  
729 **integration in single-cell genomics.** *Nat Methods* 2022, **19**:41-50.
- 730 19. Wu H, Kirita Y, Donnelly EL, Humphreys BD: **Advantages of Single-Nucleus over Single-**  
731 **Cell RNA Sequencing of Adult Kidney: Rare Cell Types and Novel Cell States Revealed**  
732 **in Fibrosis.** *J Am Soc Nephrol* 2019, **30**:23-32.
- 733 20. **Weighted Nearest Neighbor Analysis.**  
734 [[https://satijalab.org/seurat/articles/weighted\\_nearest\\_neighbor\\_analysis.html#wnn-](https://satijalab.org/seurat/articles/weighted_nearest_neighbor_analysis.html#wnn-analysis-of-10x-multiome-rna-atac-1)  
735 [analysis-of-10x-multiome-rna-atac-1](https://satijalab.org/seurat/articles/weighted_nearest_neighbor_analysis.html#wnn-analysis-of-10x-multiome-rna-atac-1)]
- 736 21. Stuart T, Srivastava A, Madad S, Lareau CA, Satija R: **Single-cell chromatin state analysis**  
737 **with Signac.** *Nat Methods* 2021, **18**:1333-1341.
- 738 22. McCarthy DJ, Campbell KR, Lun AT, Wills QF: **Scater: pre-processing, quality control,**  
739 **normalization and visualization of single-cell RNA-seq data in R.** *Bioinformatics* 2017,  
740 **33**:1179-1186.
- 741 23. Luecken M BD, Cannoodt R, Lance C, Agrawal A, Aliee H, Chen A, Deconinck L, Detweiler  
742 A, Granados A, Huynh S, Isacco, L, Kim Y, Klein D, De Kumar B, Kuppasani S, Lickert H,  
743 McGeever A, Melgarejo J, Mekonen H, Morri M, and Muller M, Neff N, Paul S, Rieck B,  
744 Schneider K, Steelman S, Sterr M, Treacy D, Tong A, Villani A, Wang G, Yan J, Zhang C,  
745 Pisco A, Krishnaswamy S, Theis F, Bloom JM: **A sandbox for prediction and integration**  
746 **of DNA, RNA, and proteins in single cells.** In *Advances of Neural Information Processing*  
747 *Systems*; 2021.
- 748



749

750 **Table 1:** Summary of the data used for simulation. Columns are number of cells (n\_cells),  
751 number of unique genes expressed per cell on average in the RNA profile (nGene\_RNA), total  
752 counts expressed per cell on average in RNA profile (nCount\_RNA), number of unique  
753 fragments per cell on average in the ATAC profile (nFrag\_ATAC), number of peak counts per cell  
754 on average in the ATAC profile (nPeakCount\_ATAC).

755

| Source                        | n_cells | nGene_RNA | nCount_RNA | nFrag_ATAC | nPeakCount_ATAC |
|-------------------------------|---------|-----------|------------|------------|-----------------|
| PBMC                          | 10085   | 2013      | 4463       | 15510      | 11305           |
| BMMC site 1<br>donor 2 (S1D2) | 6740    | 1365      | 2525       | 11064      | 7512            |
| BMMC site 1<br>or donor 1     | 29486   | 1205      | 2227       | 11798      | 7615            |

756

757

758 **Figure legends**

759

760 **Figure 1:** Outline of the benchmarking evaluations. (A) Scheme to evaluate if multiome data  
761 help the integration of single-modality data. (B) Scenarios simulated to evaluate multi-omic  
762 integration methods.

763

764 **Figure 2:** Comparison of integration performance without vs. with multiome cells. (A) The  
765 number of cells and cell types for each simulated dataset using the PBMC or BMMC multiome  
766 data as the ground truth. (B – C) Performance of cell type annotation and peak-gene  
767 association recovery in the PBMC-based simulations (B) and BMMC-based simulations (C). ARI  
768 and NMI measure agreement between predicted cell type and ground-truth labels. Peak-gene  
769 pair % recovered is the percentage of peak-gene pairs correctly identified comparing to the  
770 ground-truth list calculated using 10,412 paired PBMC cells (B) and 6,740 BMMC cells (C). F1  
771 is the prediction accuracy normalized by the number of false positives and false negatives.  
772 Dashed line shows the percent recovery and F1 score calculated using 1,000 multiome cells.  
773 Error bar is mean  $\pm$  standard deviation. (D) Runtime measured in seconds, for each method, in  
774 log<sub>2</sub> scale. Error bar is mean  $\pm$  standard deviation. (E) UMAP projection using integrated  
775 embedding for a select number of methods. UMAP projection for the other methods are shown  
776 in Supplementary Figures 3 (PBMC) and 4 (BMMC).

777

778 **Figure 3:** Evaluation of integration performance at varying sequencing depth for multiome cells.  
779 (A) Details of the simulation scheme. (B – C) Performance of cell type annotation and peak-  
780 gene association recovery in the PBMC-based simulations (B) and BMMC-based simulations (C:  
781 left panel, 2,000 multiome cells; right panel, 4,000 multiome cells). ARI and NMI measures  
782 agreement between predicted cell type and ground-truth labels. Peak-gene pair % recovered is  
783 the percentage of peak-gene pairs correctly identified comparing to the ground-truth list  
784 calculated using 10,412 paired PBMC cells (B) and 6,740 BMMC cells (C). F1 is the prediction  
785 accuracy normalized by the number of false positives and false negatives. (D) Performance of  
786 cell type annotation using Seurat v3 or Seurat v4 at increasing depth or increasing number of  
787 cells. (E) Performance of peak-gene association recovery using Seurat v3 or Seurat v4 at  
788 increasing depth or increasing number of cells. For all subplots, error bar is mean  $\pm$  standard  
789 deviation.

790

791 **Figure 4:** Evaluation of integration performance in the presence of batch effects. (A) Simulation  
792 details for the constructed data with technical batches and biological batches. (B) Performance  
793 of cell type annotation and runtime in the presence of technical and biological batches shown in  
794 (A). ARI and NMI measure agreement between predicted cell type and ground-truth labels.  
795 Runtime is measured in seconds, for each method, in log<sub>2</sub> scale. Error bar is mean  $\pm$  standard  
796 deviation. (C) Simulation details for two datasets with more complex batch structures. (D)  
797 Performance of cell type annotation and runtime in the presence of technical and biological  
798 batches shown in (C). ARI and NMI measure agreement between predicted cell type and  
799 ground-truth labels. Runtime is measured in seconds, for each method, in log<sub>2</sub> scale. Whisker is  
800 1.5 times the inter-quartile range.

801

802

803

804

A

Does Multiome aid the analysis of single-modality datasets?

bioRxiv preprint doi: <https://doi.org/10.1101/2023.02.01.526609>; this version posted February 3, 2023. The copyright holder for this preprint (which was not certified by peer review) is the author/funder, who has granted bioRxiv a license to display the preprint in perpetuity. It is made available under aCC-BY-NC-ND 4.0 International license.

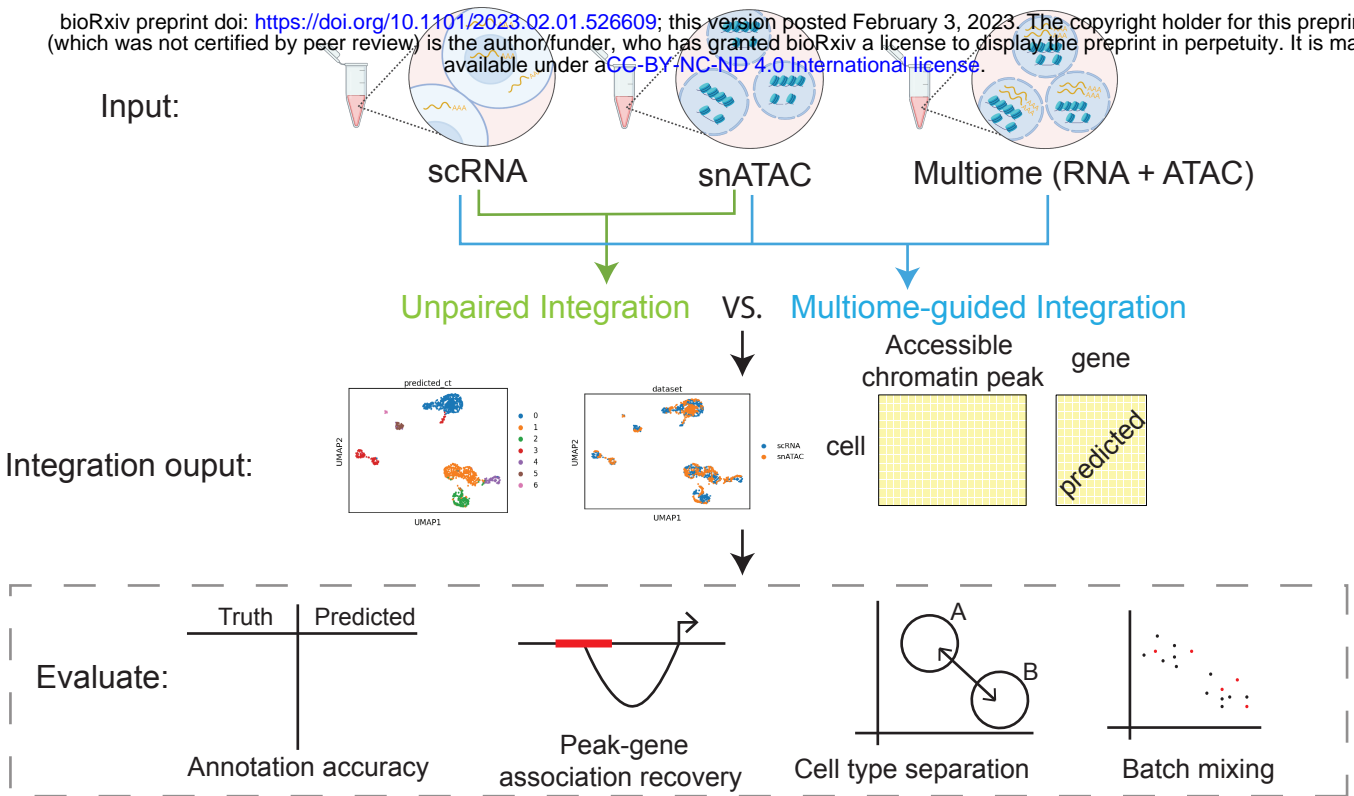

B

What is the best integration method for scRNA, snATAC, and multiome?

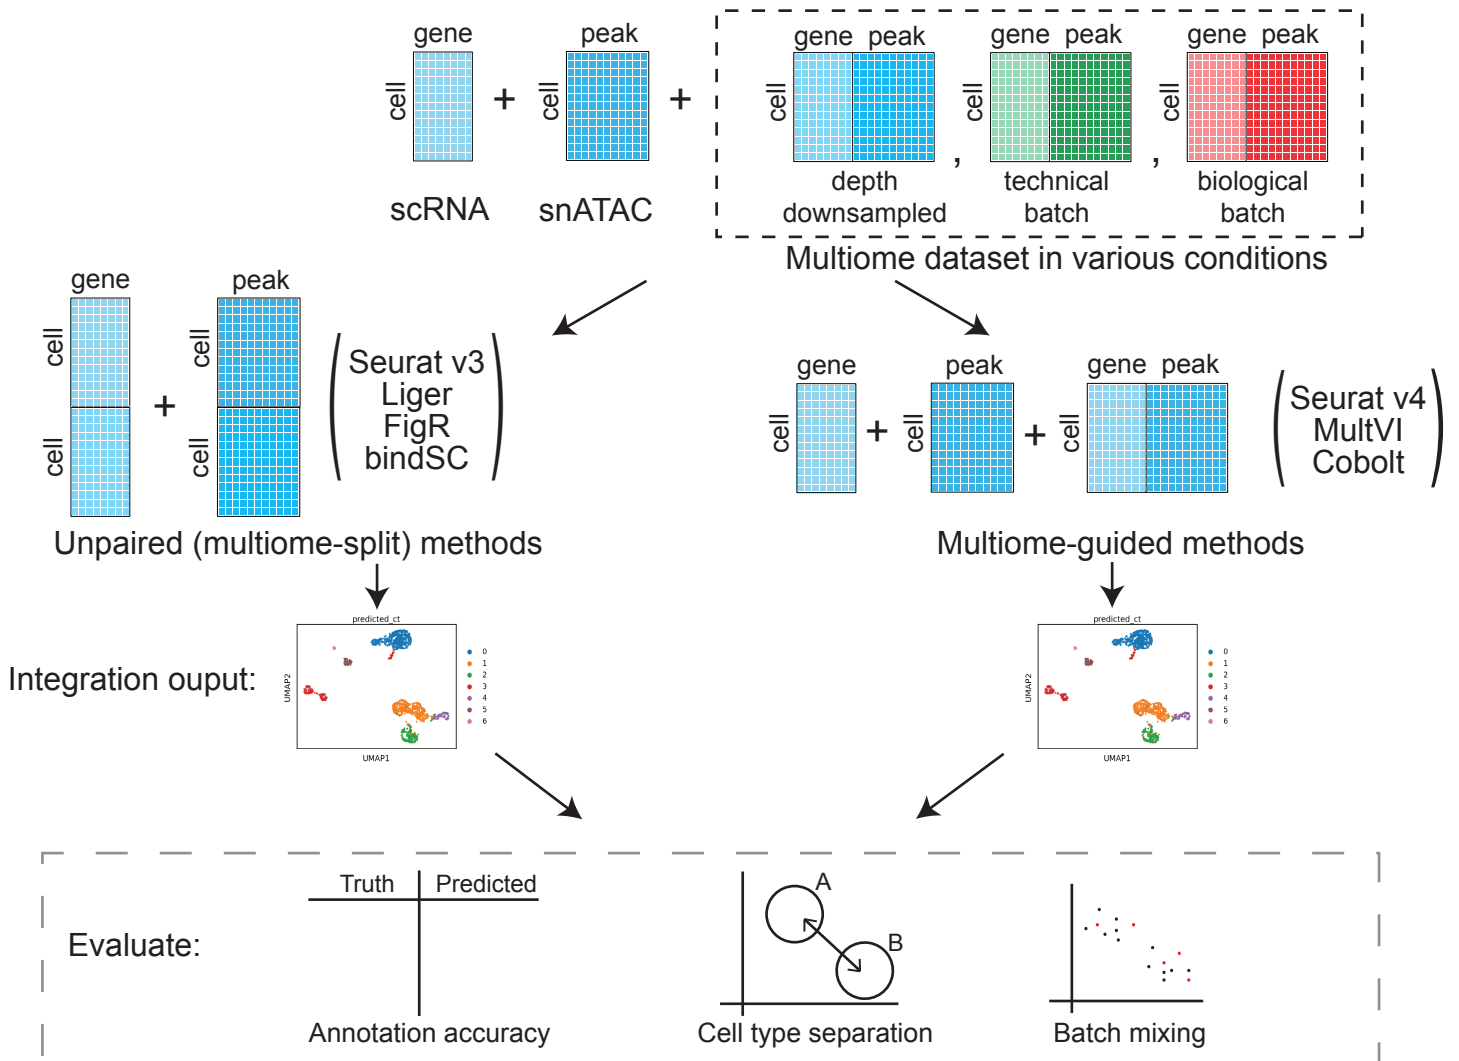

# A

bioRxiv preprint doi: <https://doi.org/10.1101/2023.02.01.526609>; this version posted February 3, 2023. The copyright holder for this preprint (which was not certified by peer review) is the author/funder, who has granted bioRxiv a license to display the preprint in perpetuity. It is made available under aCC-BY-NC-ND 4.0 International license.

| Source | scRNA | snATAC | Multiome         | Number of cell types |
|--------|-------|--------|------------------|----------------------|
| PBMC   | 1000  | 1000   | 1000, 3000, 8000 | 7                    |
| BMMC   | 1000  | 1000   | 1000, 2000, 4000 | 21                   |

# B

PBMC

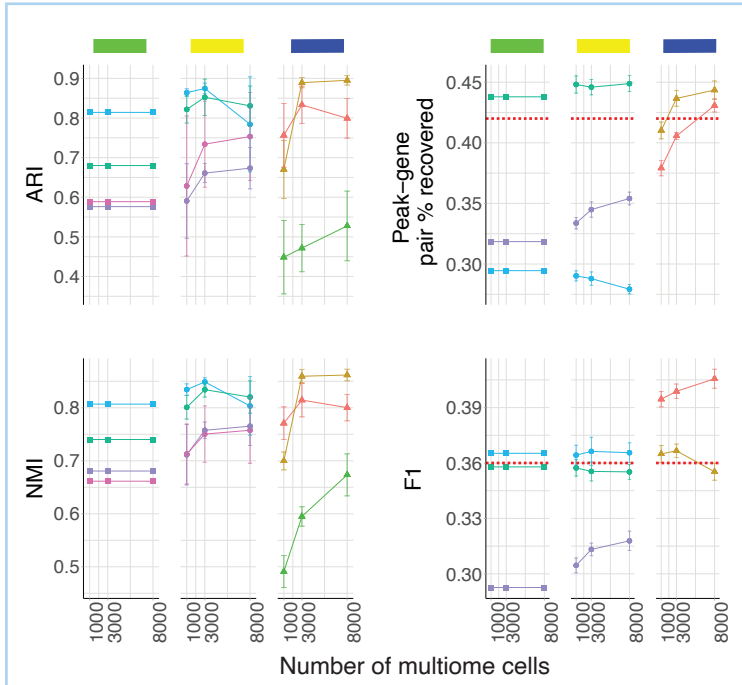

# C

BMMC

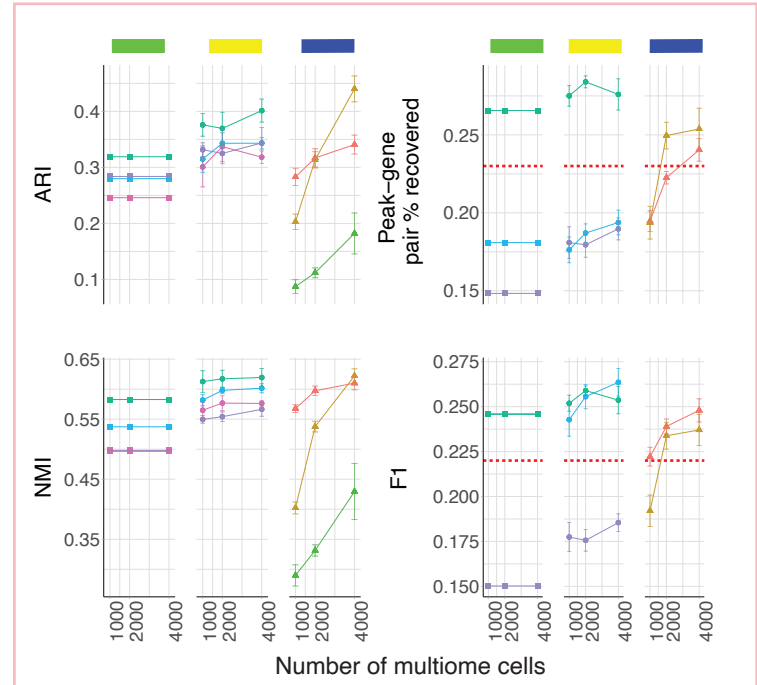

Methods: MultiVI (red circle), Seurat v4 (orange circle), Cobalt (green circle), Seurat v3 (teal circle), BindSC (blue circle), FigR (purple circle), Liger (pink circle).  
 Method types: Unpaired (green square), Unpaired (Multiome-split) (yellow square), Multiome-guided (blue square).  
 Annotation: Observed accuracy (red dashed line).

# D

PBMC

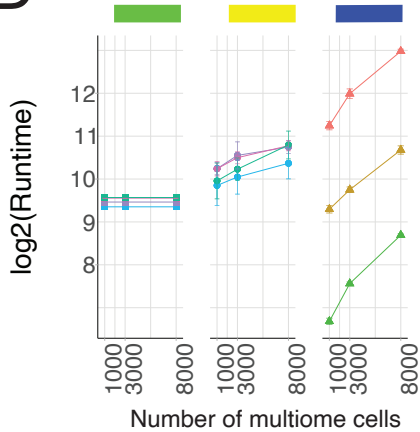

BMMC

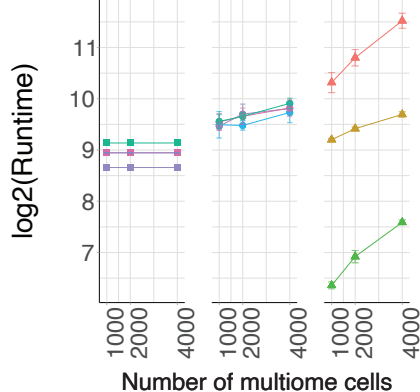

# E

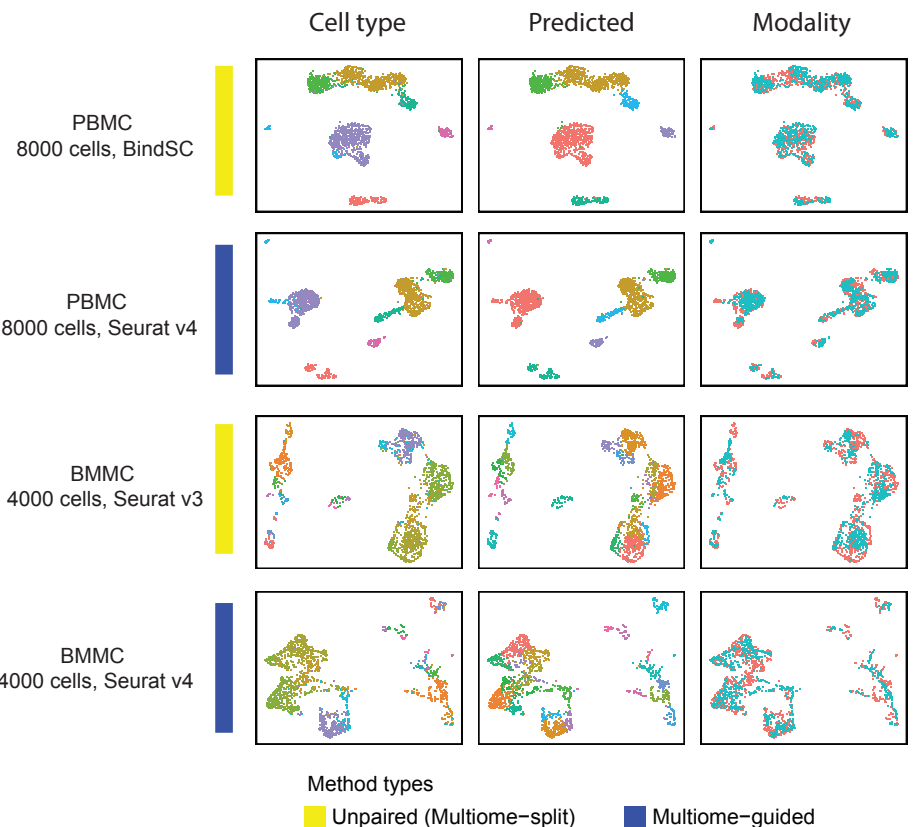

A

| Source | scRNA | snATAC | Multime | Multime      | Number of cell types |
|--------|-------|--------|---------|--------------|----------------------|
| PBMC   | 1000  | 1000   | 2000    | 25,50,75,100 | 7                    |
| BMMC   | 1000  | 1000   | 2000    | 25,50,75,100 | 21                   |
| BMMC   | 1000  | 1000   | 4000    | 25,50,75,100 | 21                   |

Methods

Seurat v3

MultiVI

Seurat v4

BindSC

FigR

Cell Ranger

Method types

Unpaired  
(Multime-split)

Multime-guided

B

PBMC 2000 multime cells, vary depth

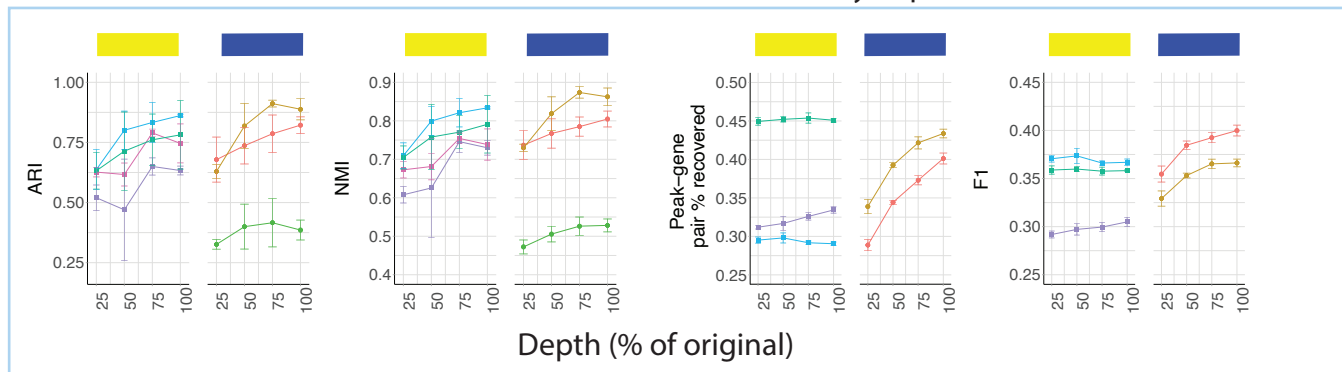

C

BMMC 2000 multime cells, vary depth

BMMC 4000 multime cells, vary depth

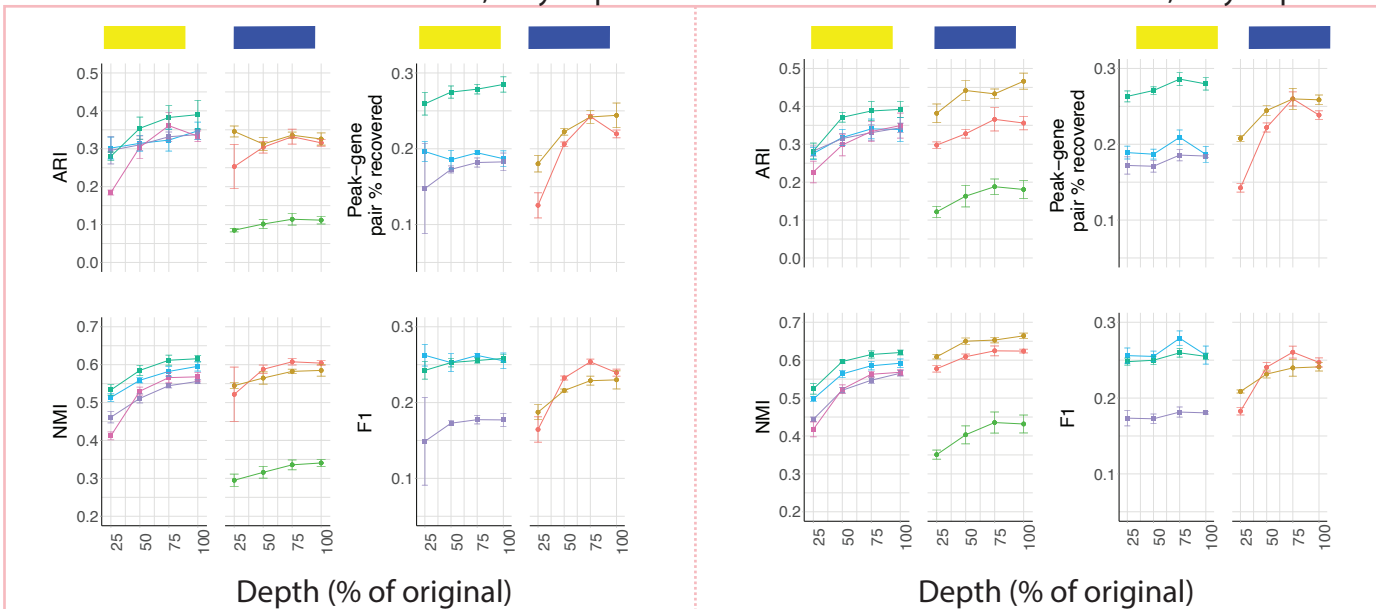

D

Seurat  
v3Seurat  
v4Seurat  
v3Seurat  
v4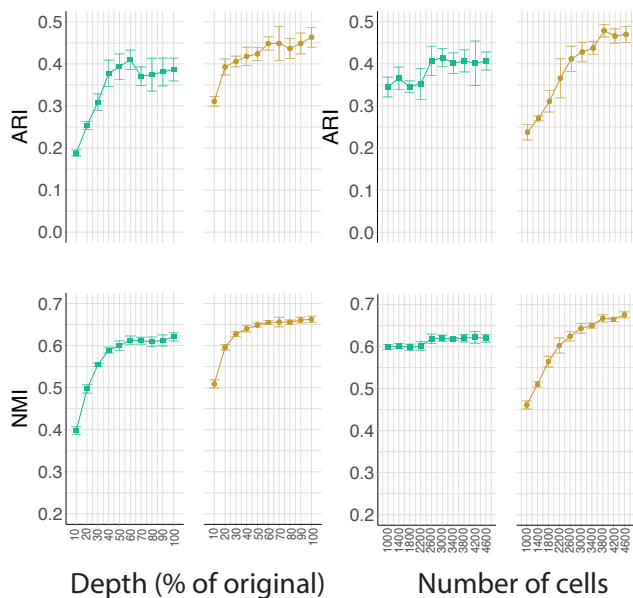

Depth (% of original)

Number of cells

E

Seurat  
v3Seurat  
v4Seurat  
v3Seurat  
v4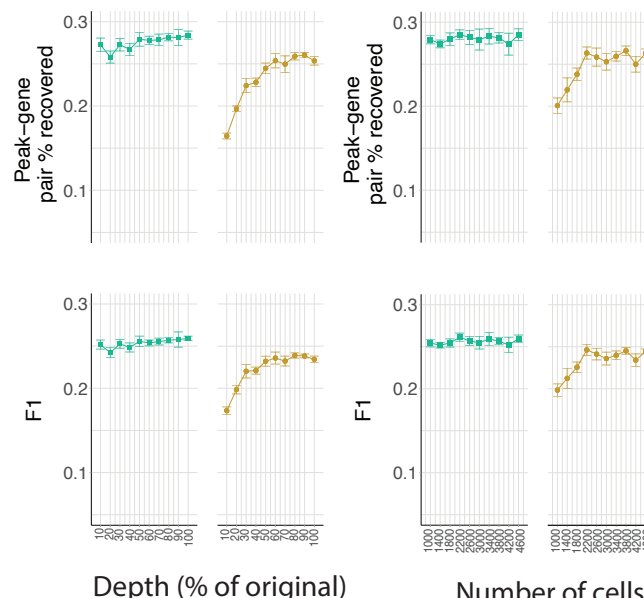

Depth (% of original)

Number of cells

**A**

bioRxiv preprint doi: <https://doi.org/10.1101/2023.02.01.526609>; this version posted February 9, 2023. The copyright holder for this preprint (which was not certified by peer review) is the author/funder, who has granted bioRxiv a license to display the preprint in perpetuity. It is made available under aCC-BY-NC-ND 4.0 International license.

|          | Donor   | Site   | Number of cells |
|----------|---------|--------|-----------------|
| scRNA    | Donor 1 | Site 2 | 1000            |
| snATAC   | Donor 1 | Site 2 | 1000            |
| Multiome | Donor 1 | Site 1 | 1000,3000,5000  |

|          | Donor   | Site   | Number of cells |
|----------|---------|--------|-----------------|
| scRNA    | Donor 2 | Site 1 | 1000            |
| snATAC   | Donor 2 | Site 1 | 1000            |
| Multiome | Donor 1 | Site 1 | 1000,3000,5000  |

**B**

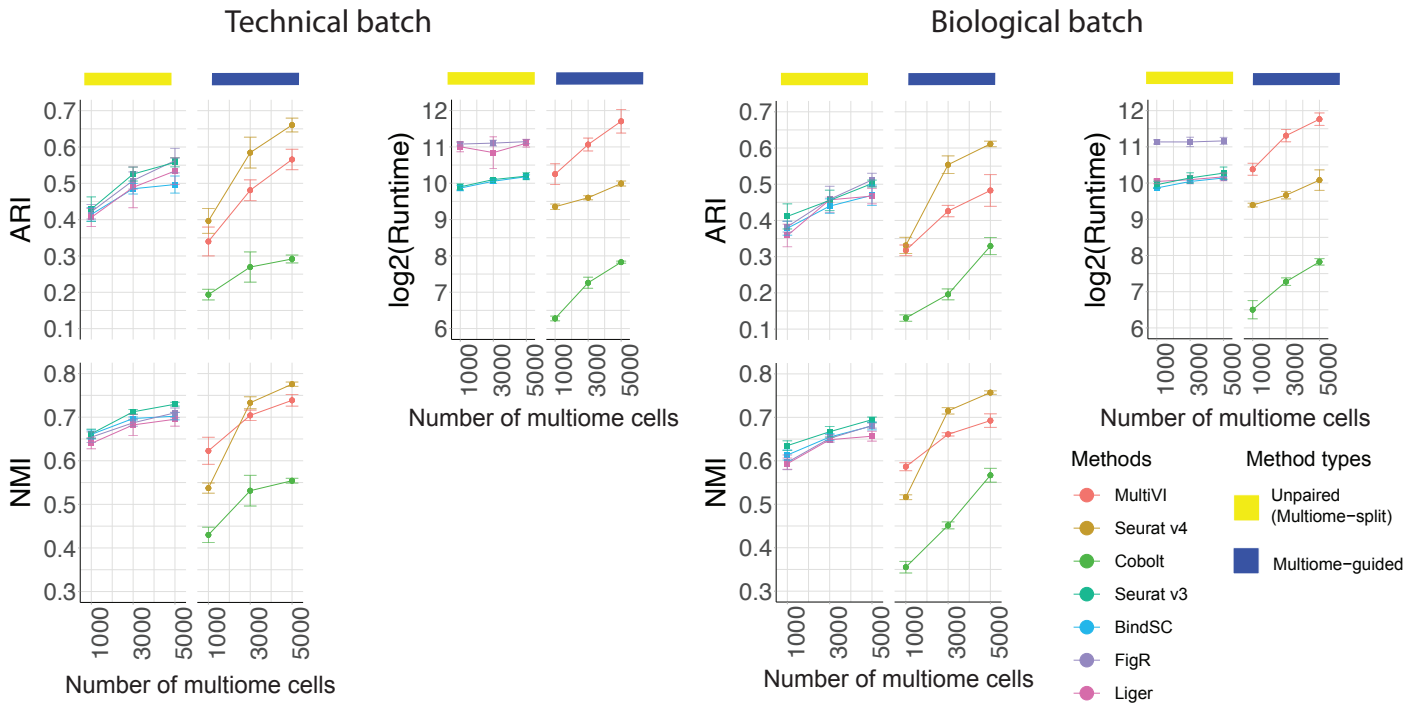

**C**

|          | Batch                           | Number of cells |
|----------|---------------------------------|-----------------|
| scRNA    | Donor 2, site 1                 | 1000            |
| snATAC   | Donor 2, site 1                 | 1000            |
| Multiome | Donor 1 site 1 + Donor 3 site 1 | 5000            |

|          | Batch                           | Number of cells |
|----------|---------------------------------|-----------------|
| scRNA    | Donor 1, site 2                 | 2000            |
| snATAC   | Donor 1, site 2                 | 2000            |
| Multiome | Donor 1 site 4 + Donor 3 site 1 | 10,000          |

**D**

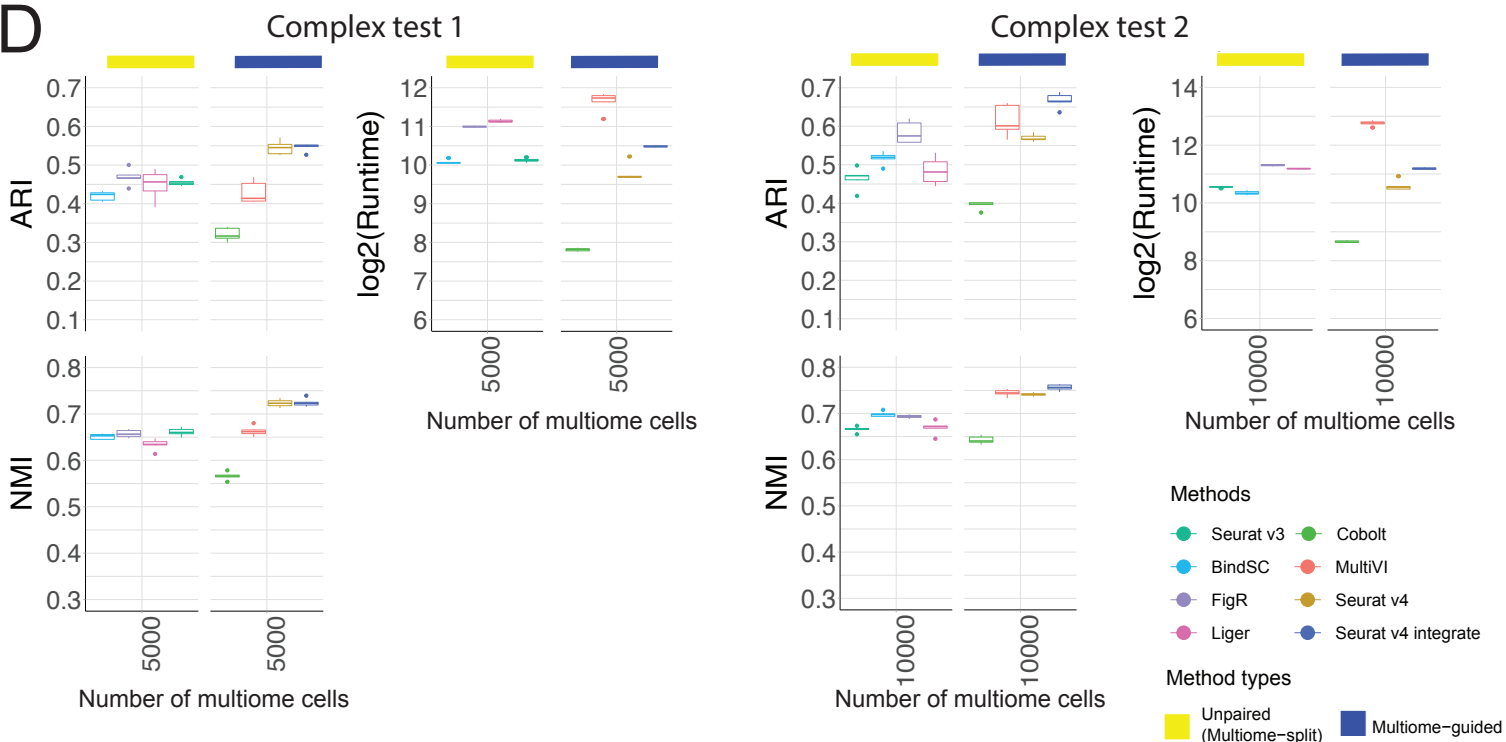

Source: https://www.biorxiv.org/content/10.1101/2023.02.01.526609v1.full.pdf
